# Supplementary material for: Light-activated shape memory of glassy, azobenzene liquid crystalline polymer networks
Source: Royal Society of Chemistry journal article supplement (doi:10.1039/c1sm00004g), 2011-01-01

## Supplementary Information

**Supplementary Table 1.** Fixing ratio ( $R_f$ ) and recovery ratio ( $R_r$ ) of PD-20CL, obtained from one-way shape memory cycles reported in Figure 1(b).

| Cycles | $R_f$ (N) (%) | $R_r$ (N) (%) |
|--------|---------------|---------------|
| 1      | 97.7          | 95.9          |
| 2      | 97.5          | 99.2          |
| 3      | 97.5          | 99.5          |

**Supplementary Figure 1.** Two-dimensional one-way shape memory cycles in PD-20CL: (i) deformation, (ii) fixing, (iii) releasing, and (iv) recovery. The asterisk indicates the beginning of the shape memory cycles.

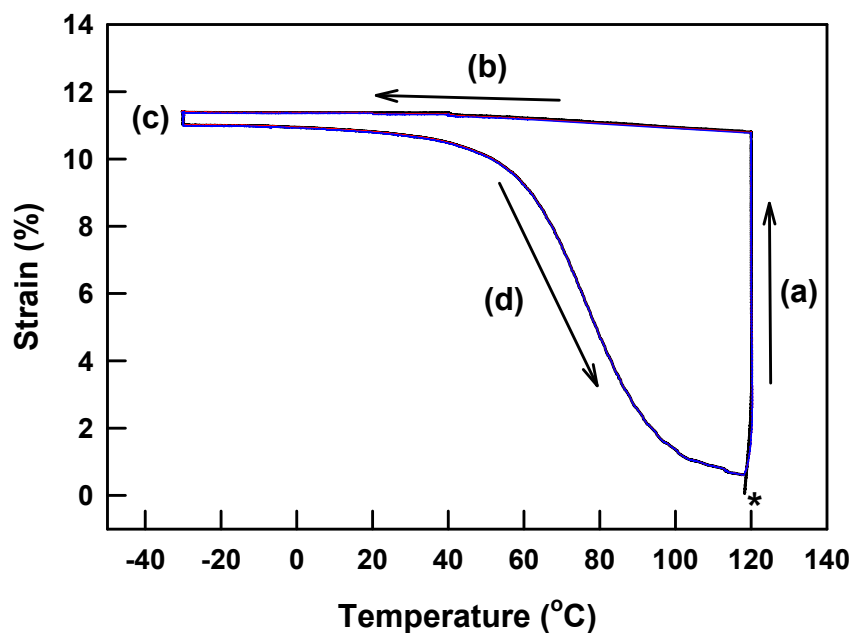

**Supplementary Figure 2.** Thermomechanical properties of MD-20CL.  $T_g = 47\text{ }^\circ\text{C}$ , obtained from the peak value of loss tangent ( $\tan \delta$ ).

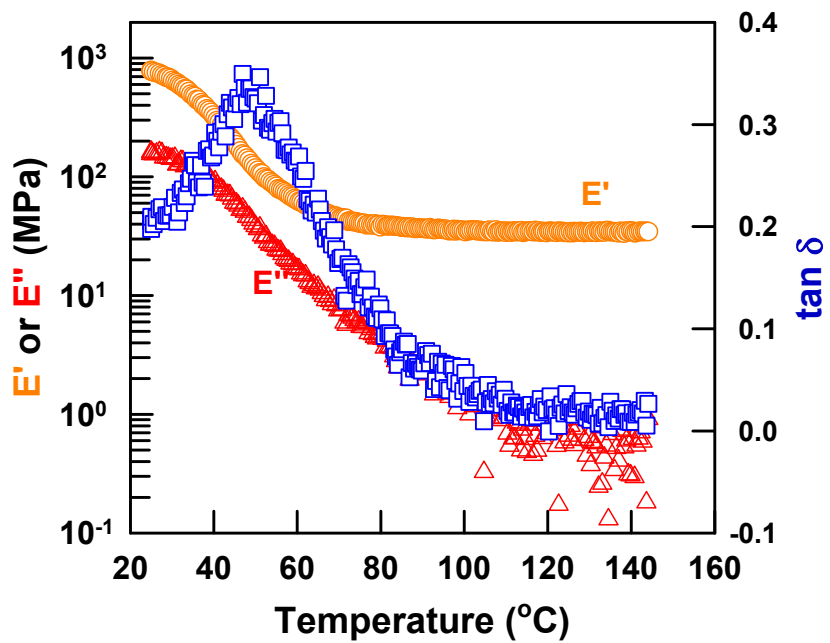

Supplement: c1sm00004g.pdf [file c1sm00004g.pdf]
